# Supplementary material for: Small Molecule Inhibition of MERTK Is Efficacious in Non–Small Cell Lung Cancer Models Independent of Driver Oncogene Status
Source: Oxford University Press journal article supplement (doi:10.1158/1535-7163.mct-15-0116), 2015-07-10
Supplement: 15357163mct150116-sup-145120_2_supp_3002890_npc3y0.docx [file 15357163mct150116-sup-145120_2_supp_3002890_npc3y0.docx]

|  | | | Plasma | | Tumor | |
| --- | --- | --- | --- | --- | --- | --- |
| Mouse | Treatment | Hours Harvested Post-Final Treatment | Conc. (nM) | Condition average (nM) | Conc. (ng/g tissue) | Condition average (ng/g tissue) |
| 1 | Saline | 1 | ND | * | < 13.3 | * |
| 2 | Saline | 1 | ND | 76.4 |
| 3 | Saline | 12 | 19.3 | * | 53.4 | * |
| 4 | Saline | 12 | ND | < 13.3 |
| 5 | 30 mg/kg | 1 | ** |  | 3670 | 3365 |
| 6 | 30 mg/kg | 1 | ** |  | 3060 |
| 7 | 30 mg/kg | 12 | 61.5 | 50.45 | 691 | 564 |
| 8 | 30 mg/kg | 12 | 39.4 | 437 |
| 9 | 50 mg/kg | 1 | 3100 | 4045 | 4840 | 6140 |
| 10 | 50 mg/kg | 1 | 4990 | 7440 |
| 11 | 50 mg/kg | 12 | 131 | 161 | 1040 | 1790 |
| 12 | 50 mg/kg | 12 | 185 | 2110 |
| 13 | 50 mg/kg | 12 | 167 | 2220 |
|  |  |  |  |  |  |  |
| ND: Not Detectable (below quantification limit).  * Cannot determine condition average due to concentrations below detectable levels | | | | | | |
|
| ** Insufficient plasma volume was collected for analysis to be performed. | | | | | | |
|

Supplemental Table 1: Concentration of UNC2025 in Mouse Serum and Tumors. Athymic Nude-*Foxn1nu* mice were injected with 5x10^6 A549 cells and tumors were established to a volume of > 150 mm3. Mice were then randomized and treated with either saline or UNC2025 at 30 mg/kg or 50 mg/kg twice daily for three days. Plasma and tumors were harvested either one or 12 hours post-treatment and UNC2025 concentrations were determined by LC-MS/MS analysis (Drumetix Laboratories, Greensboro NC).
